# Supplementary material for: Coexistence of Myelin Oligodendrocyte Glycoprotein Immunoglobulin G and Neuronal or Glial Antibodies in the Central Nervous System: A Systematic Review
Source: MDPI journal article supplement (doi:10.3390/brainsci12080995), 2022-07-27
Supplement: s1 [file s1]

(((((coexist\*[Title/Abstract]) OR (dual positive[Title/Abstract])) OR (double positive[Title/Abstract])) OR (triple positive[Title/Abstract])) OR (overlap[Title/Abstract])) AND (((("Myelin-Oligodendrocyte Glycoprotein"[Mesh]) OR ("Oligodendrocyte-Myelin Glycoprotein"[Mesh])) OR (MOG[Title/Abstract]))
